1 **Spatial Patterns of Dengue Incidence in Nepal During Record Outbreaks in 2022 and 2023:**  
2 **Implications for Public Health Interventions**

3 RH: Spatial Patterns of Dengue in Nepal, 2022-2023

4

5 Simrik Bhandari<sup>1,2</sup>, Jason K. Blackburn<sup>2,3</sup>, Sadie J. Ryan\*<sup>1,2</sup>

6 <sup>1</sup>Quantitative Disease Ecology and Conservation (QDEC) Lab, Department of Geography,  
7 University of Florida, Gainesville, FL 32611 USA

8 <sup>2</sup>Emerging Pathogens Institute, University of Florida, Gainesville, FL 32611 USA

9 <sup>3</sup>Spatial Ecology and Epidemiology Research Laboratory, Department of Geography, University  
10 of Florida, Gainesville, FL, USA

11

12 \*Correspondence to: Sadie J. Ryan, Department of Geography, University of Florida, Gainesville,  
13 FL 32611 USA, [sjryan@ufl.edu](mailto:sjryan@ufl.edu), (352) 294-7513

14

15 Keywords: Nepal, dengue, outbreak, spatial patterns, spatial association

16

17 Abstract: 243 words; Main text: 2781; 1 table, 5 figures, 1 supplemental figure

18 **Abstract**

19 Dengue, first reported as a travel case in Nepal in 2004, was initially confined to the lower  
20 plains, but has spread to higher elevations. It occurred as large outbreaks in 2022 and 2023  
21 (54,784 and 51,243 cases, respectively), reaching every district (n=77). We calculated dengue  
22 incidence in each district in 2022 and 2023, via digitizing case data from Nepal's Ministry of  
23 Health and Population, and 2021 census data from the National Statistics Office. Incidence and  
24 peak dengue months in each year were mapped, and spatial clusters (hotspots and cold spots) and  
25 spatial outliers of incidence rates for the two years were identified using Local Moran's I. In  
26 2022, district-wise peak cases occurred in August – October. One hotspot (High-High) including  
27 six districts around Kathmandu, and one cold spot (Low-Low) comprising eight high elevation  
28 districts in Nepal's northwest region were identified. In 2023, cases peaked March-November,  
29 indicating more distributed peaks, starting earlier; hotspots shifted to north-central and eastern  
30 regions, and a Low-High outlier district in the central region was identified. Identifying timing of  
31 peaks, and spatial clusters of dengue incidence can inform targeted management, improving  
32 effectiveness and cost-efficiency. This study provides a baseline examination of recent dengue in  
33 Nepal, highlighting timing and spatial clustering in incidence. The mountainous northwest cold  
34 spots align with expectations of fewer mosquitoes due to geography and climate. However,  
35 dengue peaked in all 77 districts over three months in 2022, suggesting ecological and climatic  
36 factors may no longer be effective barriers.

37 243 Words

38

## 39 Introduction

40 Dengue fever, a mosquito-borne viral infection, is a significant global public health problem,  
41 leading to an estimated 390 million infections annually<sup>1</sup>. Dengue virus (DENV) is an arbovirus in  
42 the family Flaviviridae, transmitted by *Aedes* spp. mosquitoes, primarily *Aedes aegypti* and *Aedes*  
43 *albopictus*<sup>2</sup>. DENV infection can present with a range of symptoms. Infected individuals may be  
44 asymptomatic, experience mild fever, or suffer from severe forms of the disease, such as dengue  
45 hemorrhagic fever (DHF) and dengue shock syndrome (DSS). DHF is characterized by high fever,  
46 severe headache, bleeding (such as nosebleeds or gum bleeding), and abdominal pain. DSS, a more  
47 severe progression, includes symptoms like a rapid, weak pulse, cold, clammy skin, and low blood  
48 pressure, leading to potentially life-threatening shock. Dengue is also known as 'bone-breaking  
49 fever' due to the severe muscle and bone pain it can cause<sup>3</sup>. The disease is more prevalent in  
50 warmer regions near the equator, particularly in tropical and subtropical areas<sup>4,5</sup>. The dengue virus  
51 has four distinct serotypes (DENV-1, DENV-2, DENV-3, and DENV-4). Infection with one  
52 serotype provides immunity to that specific serotype but increases the risk of severe disease if a  
53 person is subsequently infected with a different serotype<sup>6</sup>. This phenomenon complicates the  
54 development of an effective dengue vaccine.

55 Dengue impacts livelihoods, and the burden affects healthcare systems, especially in  
56 regions with tropical and subtropical climates<sup>4,5</sup>. In Nepal, dengue fever was first reported in 2004,  
57 and has evolved into a significant public health issue, now considered endemic in the country. All  
58 four dengue virus serotypes are now present and co-circulating in Nepal, and both *Aedes albopictus*  
59 and *Ae. aegypti* have been identified as the key transmission vectors in Nepal<sup>7</sup>.

60 Initially confined to the warmer southern lowland Terai region of Nepal, dengue has spread  
61 to higher elevations and previously unaffected areas<sup>8,9</sup>. Climate change has been shown to have

62 influenced mosquito breeding patterns and expanded *Aedes* spp. mosquito habitats in Nepal <sup>10,11</sup>.  
63 Additionally, excessive rainfall, poor waste management, and rapid unplanned urbanization create  
64 ideal breeding grounds for these mosquitoes. Urbanization supports mosquito breeding habitat by  
65 creating diverse artificial aquatic habitats, such as buckets and flowerpots, which provide ideal  
66 conditions for *Aedes* spp. <sup>12,13</sup>; these processes have been underway in Nepal, as in much of the  
67 world, over the past two decades. The open border with India also plays a role in dengue  
68 transmission in Nepal, facilitating cross-border introductions and transmission of the disease <sup>14</sup>.

69 Nepal's health system faces considerable challenges in controlling dengue. These include  
70 difficulties in monitoring, early detection, and diagnosis. Significant outbreaks in 2010, 2013,  
71 2016, 2019, 2022, and 2023 highlighted these challenges <sup>15</sup>. In 2020 and 2021 there was a decrease  
72 in reported cases, likely due to lockdowns and restricted movement, but underreporting due to a  
73 focus on COVID-19 may have played a role <sup>16</sup>. The year 2022 saw a significant rise in dengue in  
74 Nepal, with an alarming 54,784 cases recorded <sup>17</sup>. In 2023, although there was a decrease in the  
75 reported cases, the number was still high with 51,243. Both years saw the cocirculation of DENV-  
76 1, DENV-2, and DENV-3 <sup>18,19</sup>. In response to increasing case numbers and recent record years, the  
77 government has taken steps to mitigate outbreaks by offering free testing and treatment for dengue  
78 and focusing on prevention and control measures <sup>20</sup>.

79 Identifying where regions are experiencing higher or lower than expected disease incidence  
80 can inform targeted public health interventions like mosquito control programs and public health  
81 education, ensuring efficient resource allocation in high-risk zones. Geospatial methods are crucial  
82 to studying disease incidence and spread, particularly in a management context <sup>21,22</sup>. The Local  
83 Indicators of Spatial Association (LISA) statistic is often used in exploratory spatial data analysis  
84 (ESDA) frameworks to quantify spatial clustering or dispersion of disease cases or incidence in a

85 study area, including studies of dengue and other arboviral diseases in emerging and endemic  
86 settings<sup>23,24</sup>. Identifying spatially discrete areas of significantly high (e.g. hotspots) or low (e.g.  
87 cold spots) disease activity within administrative functional boundaries, can frame responses to  
88 public health events. In this study, we mapped district level dengue incidence in Nepal in 2022 and  
89 2023, identify peak case months by district, and identify patterns of spatial heterogeneity in  
90 incidence across the country, using LISA methods.

91

## 92 **Methods**

### 93 *Study Area*

94 Nepal is a small (147,516 km<sup>2</sup>) mountainous, landlocked country in South Asia, surrounded by  
95 China to the north and India to the south, east, and west. The population in 2021 was 29,164,578,  
96 with a population growth rate of 0.92%<sup>25</sup>. The country exhibits diverse topography and ecology  
97 with low-lying Terai plains in the south, hilly midlands, and the high Himalayas mountains in the  
98 north<sup>26</sup> (Figure 1). Nepal experiences four distinct climatic periods during the year: the pre-  
99 monsoon season (March to May), the monsoon season (June to September), the post-monsoon  
100 period (October to November), and the winter months (December to February)<sup>27</sup>.  
101 Administratively, Nepal is currently divided into seven provinces and 77 districts.

102

103 **Figure 1. Ecological and Administrative Divisions of Nepal.** The 77 districts and 7 provinces of  
104 Nepal, overlaid on three ecological divisions: Mountain (white), Hill (green), and Terai (brown).

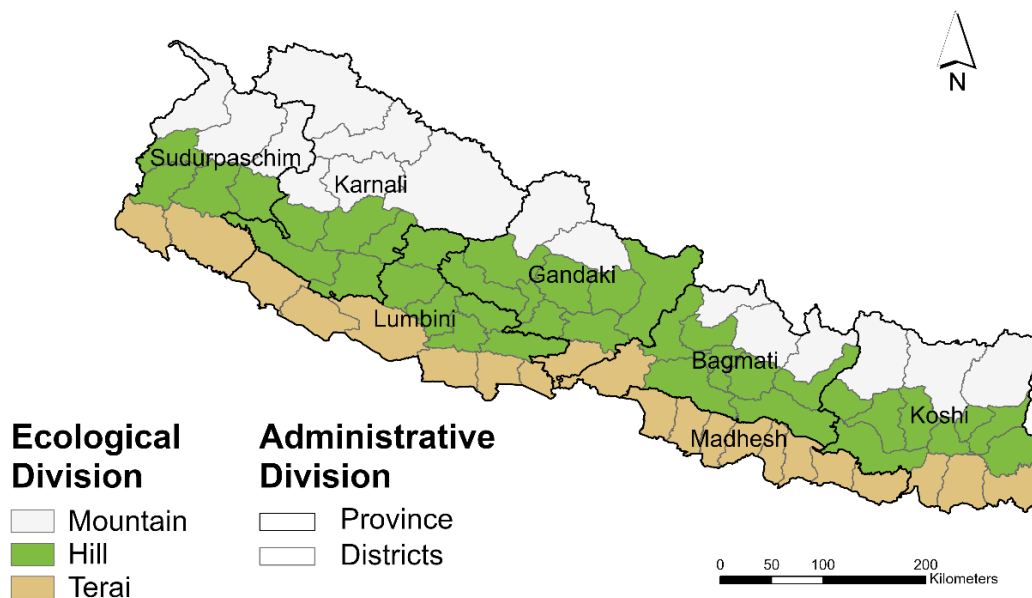

105

#### 106 *Data Acquisition and Processing*

107 Monthly district-level dengue cases reported for 2022 and 2023 were obtained from the  
108 Epidemiology and Disease Control Division (EDCD) of the Ministry of Health and Population,  
109 Nepal<sup>28,29</sup>. Population data for each district was obtained from the National Census Report 2011<sup>30</sup>  
110 and 2021<sup>25</sup>. Administrative division shapefiles (geographic coordinate system WGS 1984) were  
111 downloaded from the National Geo Portal (<https://nationalgeoportal.gov.np/>). Dengue cases and  
112 population datasets were digitized and geospatially joined to district polygons for analyses and  
113 visualization using ArcGIS Pro<sup>31</sup>.

114 *Population projections:* District level population estimates for 2022 and 2023 were projected from  
115 2011 and 2021 census data using an exponential growth model<sup>32,33</sup>. The annualized growth rate  
116 ( $r$ ) was calculated as:

117  $r = \ln(P_2/P_1)/t,$

118 where  $P_1$  is the 2011 population count,  $P_2$  is the 2021 population count, and  $t$  is the number of  
119 years between the two censuses.

120 This growth rate was then used to project the population for the required years:

121  $P_x = P_2 \cdot e^{rt},$

122 where  $P_x$  is the population estimate for the target year  $x$ , and  $t$  is years from the 2021 census to the  
123 target year (2022, 2023).

124 *Case Timing Peaks:* The months of peak case number, by district, were recorded, for 2022 and  
125 2023, and geospatially joined to district polygons for mapping.

126 *Incidence rates:* Annual dengue incidence rates per 100,000 were calculated using GeoDa 1.20<sup>34</sup>.  
127 Dengue incidence was calculated as the total number of dengue cases in a reporting year in each  
128 district divided by its total population.

129 
$$\text{Incidence} = \frac{\text{Dengue case in the district}}{\text{Total population in the district}} \times 100,000$$

130 *Spatial Clustering:* Global Moran's  $I$  provides an indicator of spatial clustering, to assess whether  
131 a phenomenon is spatially random, clustered, or dispersed on a landscape. This index takes values  
132  $-1 - 1$ , from dispersed to clustered, and through simulations, permutations can provide a  
133 distribution of values, such that a statistic of significance can be assessed. This was applied to  
134 district-wise incidence in each 2022 and 2023, and 999 permutations run in GeoDa software to  
135 derive z-scores and assess significance at 0.025, to account for two years in this analysis.

136 *LISA Analysis:* Local Moran's  $I$  statistic is a popular tool used in spatial analysis to identify disease  
137 patterns<sup>35,36</sup>. It analyzes whether similar or dissimilar values in a dataset are geographically

138 clustered, to detect areas of hotspots, cold spots, and outliers<sup>37</sup>. When working with small  
139 population areas, rate data, such as incidence, can be subject to instability due to small populations  
140 in sub-regions. Smoothing techniques in spatial analysis are applied to adjust rates to account for  
141 this instability<sup>38</sup>. To assess any potential rate instability in this study, both Empirical Bayes  
142 Smoothing (EBS) and Spatial Bayes Smoothing (SBS) were applied to the incidence rates and  
143 compared to raw rates using box plots (Figure S1).

144 Local Moran's I was calculated for the raw incidence rate using a queen contiguity spatial  
145 weight matrix with 999 permutations at a 0.025 significance level (to account for analyses  
146 spanning two years), identifying significant clusters and outliers. Maps of significant hotspots and  
147 cold spots for each year were constructed to visually assess spatial patterns.

148

## 149 **Results**

150 Dengue was first reported in Nepal in 2004, as a travel case, and was initially constrained to the  
151 lowland Terai region. Until 2010, reported cases remained fewer than 50 each year; in the next  
152 decade, annual cases had increased to being reported in the several hundred, with 2016 and 2017  
153 first seeing numbers exceeding a thousand. In 2019, an outbreak of nearly 18,000 reported cases  
154 brought attention to this public health threat, and its expansion in the country. In 2020 and 2021,  
155 perhaps due to redirected resources for the COVID-19 pandemic, reported cases were in the  
156 hundreds. In 2022 and 2023, echoing dengue outbreaks around the world, Nepal had outbreaks  
157 with case numbers reported more than double that of any prior year on record (Figure 2).

158

159



160 **Figure 2. Yearly reported dengue cases in Nepal**

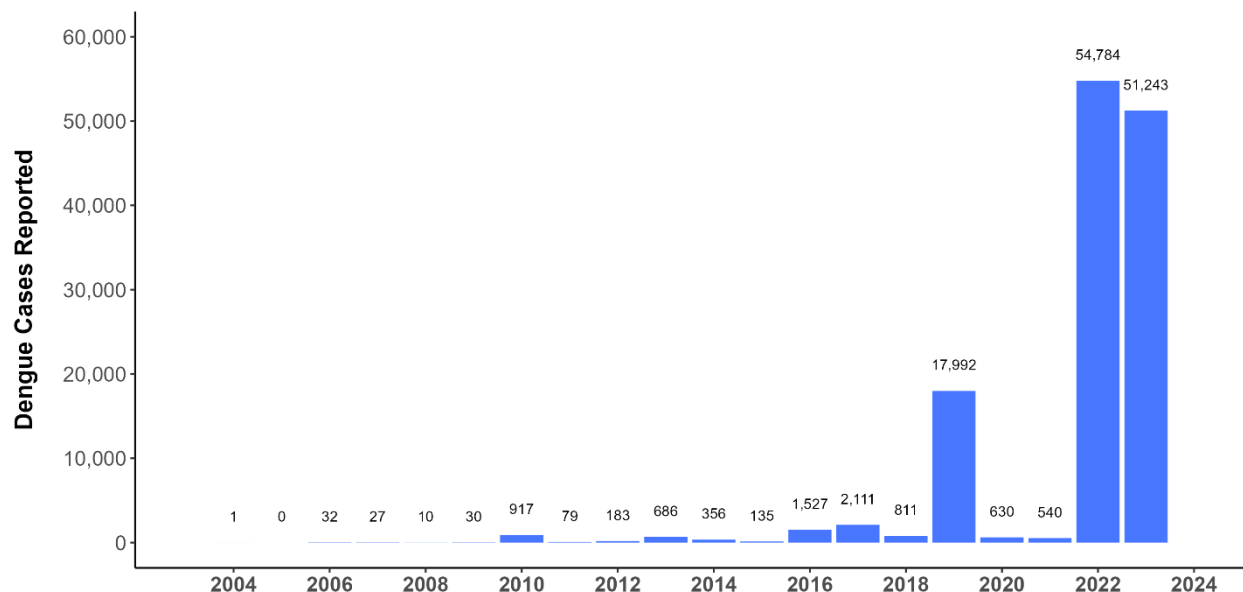

161

162 In 2022, in Nepal, there was a total of 54,784 reported dengue cases, and district level incidence  
163 ranged from a low of 4.21 to a high of 1,716.89. In 2023, the total number of reported cases was  
164 51,243, with a district level incidence range of 2.49 to 2,242.44. The districts with the highest  
165 incidence rates were not identical between the two years, and in 2023, high incidence rates  
166 occurred further east than in 2022 (Figure 3).

167

168

169 **Figure 3. Incidence per 100,000 by districts of Nepal in 2022 and 2023**

A (2022)

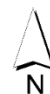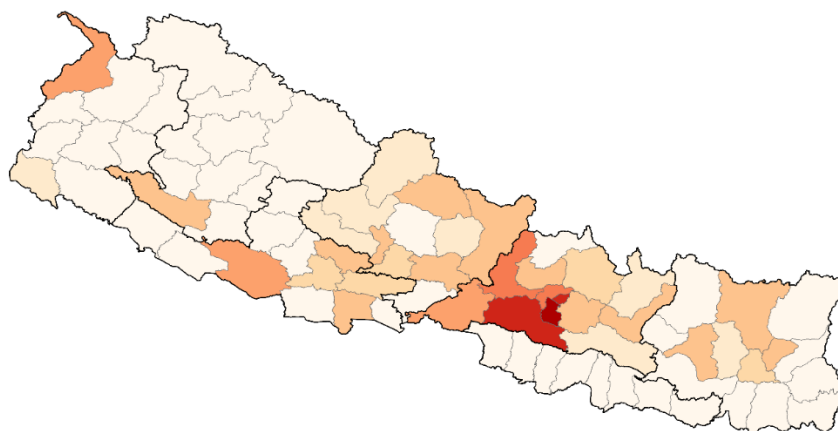

B (2023)

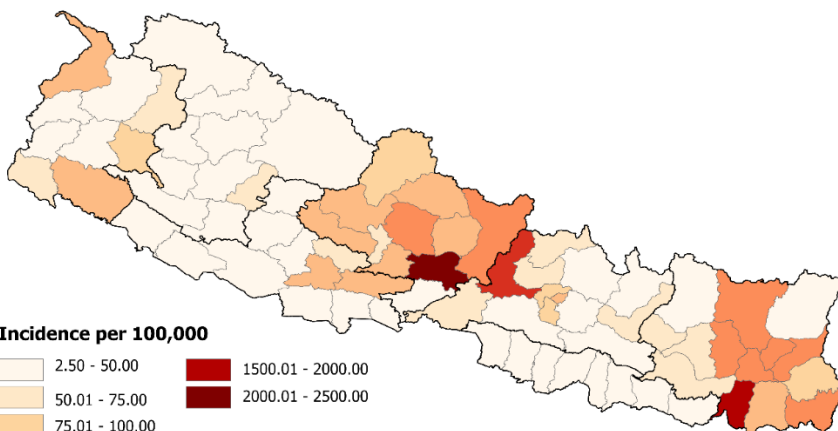

**Incidence per 100,000**

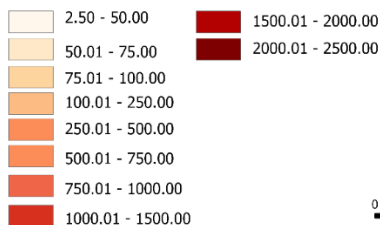

0 50 100 200 Kilometers

170

171

172 The district level peak case month map for 2022 year illustrates that most dengue cases were  
173 reported in the months of August, September, and October (Figure 4A), with no obvious spatial  
174 patterns, suggesting that the whole country experienced one epidemic peak season. In 2023, cases

175 were at their highest in some districts as early as March and peaked as late as November in the  
176 mountainous region (Figure 4B). The pattern of peak months in 2023 was more heterogeneous,  
177 although this was only visually assessed.

178 **Figure 4. Month of peak number of dengue cases by district in 2022 and 2023**

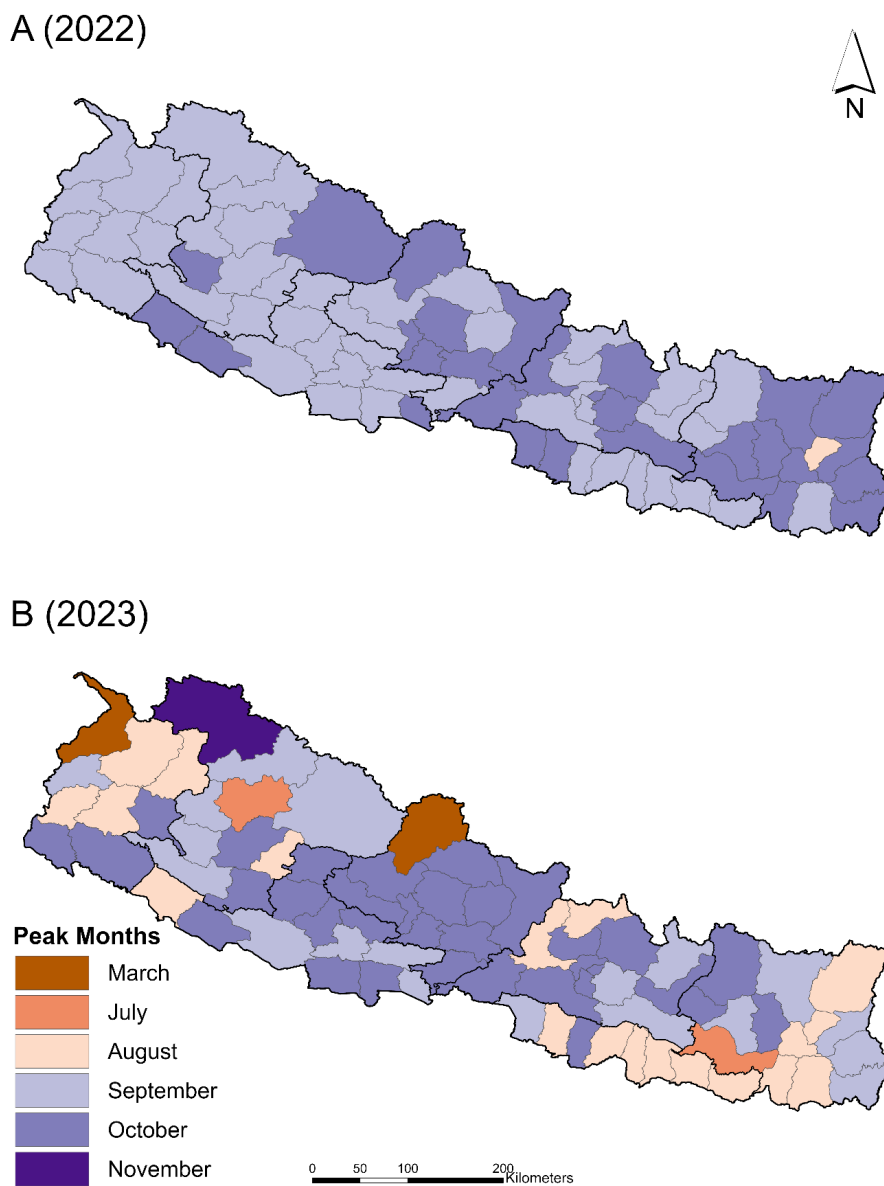

179

180 Global Moran's  $I$  indicated clustering in both 2022 and 2023, with positive values of  $I$  (Table 1).  
181 Based on permutation tests, 2022 showed significant clustering at the global level, for our criterion  
182 of significance level ( $\alpha=0.025$ ).

183

184 **Table 1:** Global Moran's  $I$  values for dengue incidence, aggregated to district for 2022 and 2023

| Year | Total Dengue Cases | Moran's $I$ | Z-score | P-value      |
|------|--------------------|-------------|---------|--------------|
| 2022 | 54,784             | 0.472       | 7.4798  | <b>0.001</b> |
| 2023 | 51,243             | 0.095       | 1.7947  | 0.060        |

185 P-values in bold indicate statistically significant results.

186 \*Moran's  $I$  values range between -1 and 1, where negative values indicate dispersion and positive values indicate clustering

187

188

189

190 **Figure 5. Hotspots and cold spots of dengue incidence as identified by Local Indicator of**  
191 **Spatial Association (LISA) for 2022 and 2023 in Nepal.** Areas in red indicate clusters of districts  
192 where districts with high rates are surrounded by districts with similarly high rates, indicating a  
193 significant hotspot for dengue transmission. Blue areas represent low clusters, indicating districts  
194 with low rates surrounded by districts with similarly low rates. The area in light blue color indicates  
195 statistically significantly lower incidence than expected for its neighboring districts.

A (2022)

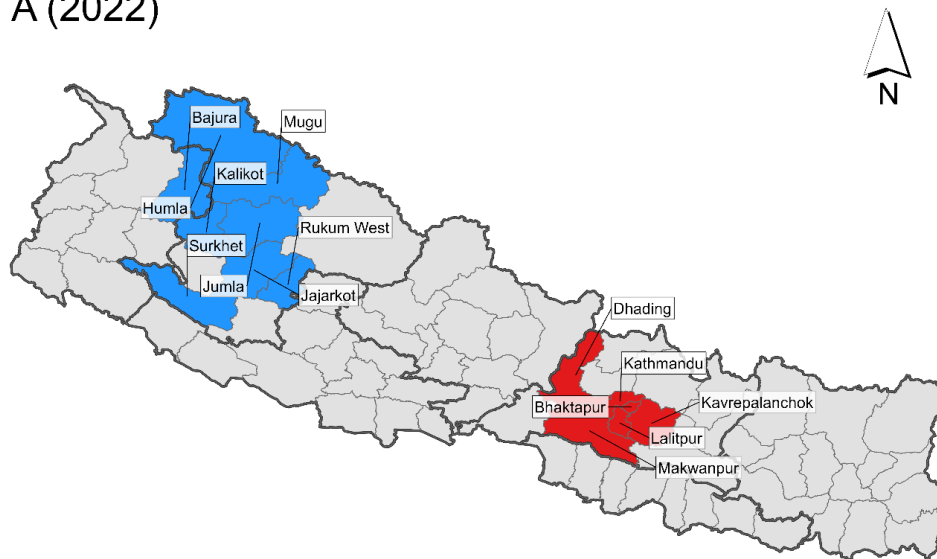

B (2023)

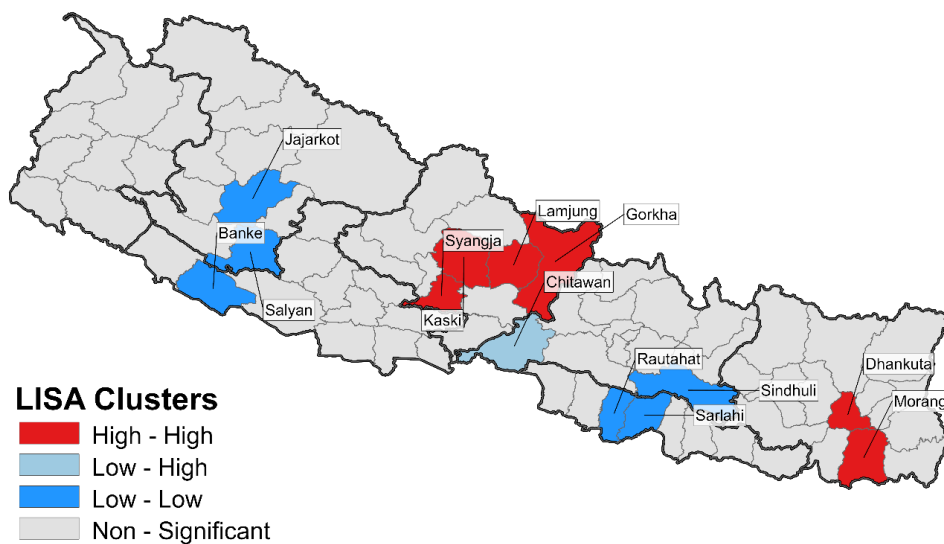

196

197

198           The LISA map for 2022 dengue incidence (Figure 5A) shows one hotspot and one regional  
199 cold spot. Six districts in the centrally located province of Bagmati (Kathmandu, Lalitpur,  
200 Bhaktapur, Kavrepalanchowk, Makwanpur and Dhading) had statistically higher dengue incidence  
201 and eight districts had statistically lower dengue incidence in the west (Humla, Mugu, Bajura,  
202 Kalikot, Jumla, Jajarkot, Rukum West, Surkhet).

203           The LISA map for 2023 dengue incidence reveals a shift in clusters (Figure 5B) to two  
204 hotspots and two cold spots. Four centrally located districts (Gorkha, Lamjung, Kaski, and  
205 Syangjha) and 2 districts located to the east (Dhankuta, Morang) had statistically higher dengue  
206 incidence. Similarly, three districts in the west (Jajarkot, Salyan, Banke) and three centrally located  
207 districts (Sindhuli, Sarlahi, Rautahat) had statistically lower dengue incidence. One Low – High  
208 outlier in the Chitwan district also indicates a lower incidence than in neighboring districts.

## 209 **Discussion**

210 In 2022 and 2023, Nepal experienced dengue outbreaks reporting more than double the number of  
211 cases of any prior year on record. In a country experiencing such rapid and expansive outbreaks  
212 of this emergent vector-borne disease, visualizing and understanding spatial patterns and timing  
213 can inform public health planning and intervention. Dengue cases were reported in every district  
214 of the country in 2022, which indicates that previously assumed climate and ecological barriers to  
215 establishment and transmission are no longer acting to curb its spread. Using exploratory  
216 geospatial approaches, we digitized and visualized the 2022 and 2023 dengue outbreak years for  
217 Nepal, based on published case data and census population projections.

218           Mapped peak case months by districts showed that in 2022, the highest case numbers  
219 occurred clumped in time, spanning August to October with no obvious heterogeneity in the

220 country. However, in 2023, peak case numbers occurred in districts from March to November, with  
221 mountainous districts peaking both earliest and latest, and showing a patchier distribution of peak  
222 months across the country. Annual incidence maps showed that in 2022, very high incidence  
223 districts were largely clumped around Kathmandu, while in 2023, not only were these not the same  
224 districts showing higher incidence, but an emergence of higher reported incidence in eastern Nepal  
225 emerged. The distribution of incidence was clustered in both years at the global scale, but only  
226 significantly so in 2022. This was echoed in a shift in dengue hotspots and cold spots from the year  
227 2022 to 2023. In 2022, the hotspot (high-high cluster of districts) identified around Kathmandu  
228 was also contained entirely within Bagmati province, while in 2023, the two identified hotspots  
229 were clusters of districts occurring in the two provinces to the west (Gandaki) and east (Koshi).  
230 Interestingly, one district in Bagmati became part of a cold spot in 2023, suggesting lower  
231 incidence than expected, and a second district in Bagmati (Chitwan) was a low-high outlier in  
232 2023, indicating incidence rates significantly lower than expected, and not part of a cluster.  
233 Whether province-level shifts such as this could reflect the impact of population level immunity  
234 from the prior year at the district-level, or successful interventions, improved vector-control and  
235 prevention, requires follow-up studies leveraging approaches outside the scope of this study, but  
236 including serological surveillance, and cross-sectional or longitudinal health center level survey  
237 instruments.

238 It is important to note that this study relies on reported case data, and in a large and rapidly  
239 unfolding outbreak situation, the availability of diagnostic testing, accessibility to health facilities  
240 and implementation of intervention are unevenly distributed in space and time, which may create  
241 uneven data reporting, and over-representation of better resourced areas. While we might expect  
242 that areas with very sparse populations, where healthcare access is quite limited, such as the

243 mountainous region, could lead to a lack of reporting, the presence of cases reported in every  
244 district in 2022 suggests that this did not lead to overly spatial biased outcomes in our study.  
245 However, we are cautious in our interpretation of the cold spot cluster of low-low incidence in the  
246 northwest mountainous region identified in 2022, as it may be more indicative of sparse reporting  
247 than existing prevention. While the sparse population in the mountainous districts could also  
248 distort incidence rate calculation, we found that the incidence rates were not unstable or impacted  
249 by population distribution for the purposes of conducting the ESDA analyses here.

250         Using local indicators of spatial association (LISA) methods, the study identified hotspots  
251 (i.e., districts with higher dengue incidence) indicating potential high-priority areas for targeted  
252 health measures in those regions. In the scenario of vector-borne disease management, these can  
253 indicate areas that may need increased intervention, such as spraying, larval source management  
254 (LSM), or increased allocation of hospital resources for palliative care and diagnostic testing. The  
255 shifts in identified hotspots between the two years in this study are worth further consideration, to  
256 explore how best to allocate limited resources. The study also highlighted cold spots, regions with  
257 lower than expected dengue incidence, which could result from how local health strategies,  
258 population immunity, or case reporting vary from place to place.

259         Nepal is a small country with diverse topography leading to a sharp climate and ecological  
260 gradients. It is experiencing rapid shifts in climate-induced impacts, which influences both human  
261 population distributions on the landscape, and the ecology of vector habitats. Understanding the  
262 dynamics underpinning the spatial patterns of a rapidly establishing vector borne disease described  
263 here through analysis of spatial human incidence data requires further investigation. Future  
264 research on the spatial distribution of dengue in Nepal should explore additional drivers  
265 (socioeconomic, climatic, and environmental influences) of dengue transmission.



266

267 Supplemental Material

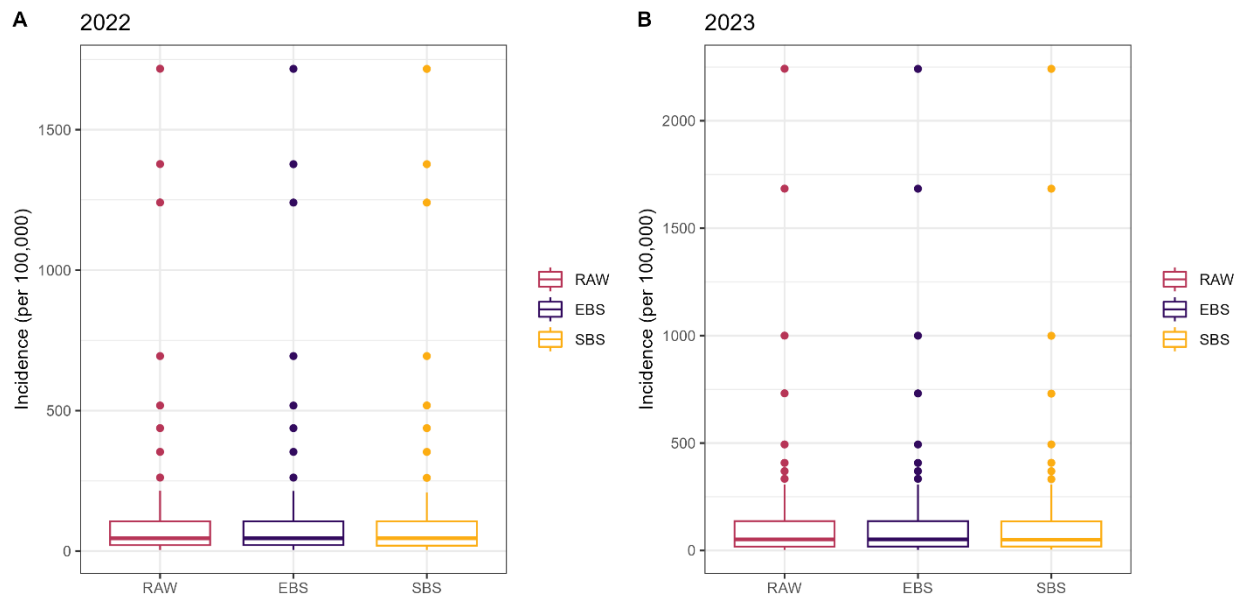

268

269 **Figure S1:** Boxplot comparison of incidence rates for A. 2022, and B. 2023, showing no  
270 appreciable differences among Unsmoothed (RAW), Empirical Bayes Smoothing (EBS), and  
271 Spatial Bayes Smoothing (SBS)

272

273

274 **Acknowledgments**

275 **Financial Support**

276 SB and SJR were supported by NSF BII 2213854.

277 **Disclosures regarding real or perceived conflicts of interest.**

278 The authors report no conflicts of interest.

279 **References**

- 280 1. Bhatt S, Gething PW, Brady OJ, Messina JP, Farlow AW, Moyes CL, Drake JM,  
281 Brownstein JS, Hoen AG, Sankoh O, Myers MF, George DB, Jaenisch T, Wint GRW,  
282 Simmons CP, et al., 2013. The global distribution and burden of dengue. *Nature* 496: 504–  
283 507
- 284 2. De Almeida RR, Paim B, De Oliveira SA, Souza AS, Gomes ACP, Escuissato DL, Zanetti  
285 G, Marchiori E., 2017. Dengue Hemorrhagic Fever: A State-of-the-Art Review Focused in  
286 Pulmonary Involvement. *Lung* 195: 389–395
- 287 3. World Health Organization., 2009. Dengue guidelines for diagnosis, treatment, prevention  
288 and control : new edition
- 289 4. Gubler DJ., 2002. Epidemic dengue/dengue hemorrhagic fever as a public health, social and  
290 economic problem in the 21st century. *Trends Microbiol* 10: 100–103
- 291 5. Guzman MG, Halstead SB, Artsob H, Buchy P, Farrar J, Gubler DJ, Hunsperger E, Kroeger  
292 A, Margolis HS, Martínez E, Nathan MB, Pelegrino JL, Simmons C, Yoksan S, Peeling  
293 RW., 2010. Dengue: a continuing global threat. *Nat Rev Microbiol* 8: S7–S16
- 294 6. Gubler D., 1998. Dengue and Dengue Hemorrhagic Fever. *Clin Microbiol Rev* 11: 480–496

- 295 7. Kawada H, Futami K, Higa Y, Rai G, Suzuki T, Rai SK., 2020. Distribution and pyrethroid  
296 resistance status of *Aedes aegypti* and *Aedes albopictus* populations and possible  
297 phylogenetic reasons for the recent invasion of *Aedes aegypti* in Nepal. *Parasit Vectors* 13:  
298 213
- 299 8. Dhimal M, Gautam I, Kreß A, Müller R, Kuch U., 2014. Spatio-Temporal Distribution of  
300 Dengue and Lymphatic Filariasis Vectors along an Altitudinal Transect in Central Nepal.  
301 *PLoS Negl Trop Dis* 8: e3035
- 302 9. Tuladhar R, Singh A, Varma A, Choudhary DK., 2019. Climatic factors influencing dengue  
303 incidence in an epidemic area of Nepal. *BMC Res Notes* 12: 131
- 304 10. Acharya BK, Cao C, Lakes T, Chen W, Naeem S., 2016. Spatiotemporal analysis of dengue  
305 fever in Nepal from 2010 to 2014. *BMC Public Health* 16: 849
- 306 11. Pandey BD, Pandey K, Neupane B, Shah Y, Adhikary KP, Gautam I, Hagge DA, Morita K.,  
307 2015. Persistent dengue emergence: the seven years surrounding the 2010 epidemic in  
308 Nepal. *Trans R Soc Trop Med Hyg*: trv087
- 309 12. Li Y, Kamara F, Zhou G, Puthiyakunnon S, Li C, Liu Y, Zhou Y, Yao L, Yan G, Chen X-G.,  
310 2014. Urbanization Increases *Aedes albopictus* Larval Habitats and Accelerates Mosquito  
311 Development and Survivorship. *PLoS Negl Trop Dis* 8: e3301
- 312 13. Wilke ABB, Chase C, Vasquez C, Carvajal A, Medina J, Petrie WD, Beier JC., 2019.  
313 Urbanization creates diverse aquatic habitats for immature mosquitoes in urban areas. *Sci*  
314 *Rep* 9: 15335
- 315 14. Pokharel P, Khanal S, Ghimire S, Pokhrel KM, Shrestha AB., 2023. Frequent outbreaks of  
316 dengue in Nepal – causes and solutions: a narrative review. *Int J Surg Glob Health* 6

- 317 15. Acharya KP, Chaulagain B, Acharya N, Shrestha K, Subramanya SH., 2020. Establishment  
318 and recent surge in spatio-temporal spread of dengue in Nepal. *Emerg Microbes Infect* 9:  
319 676–679
- 320 16. Pandey BD, Ngwe Tun MM, Pandey K, Dumre SP, Bhandari P, Pyakurel UR, Pokhrel N,  
321 Dhimal M, Gyanwali P, Culleton R, Takamatsu Y, Costello A, Morita K., 2022. Has  
322 COVID-19 suppressed dengue transmission in Nepal? *Epidemiol Infect* 150: e196
- 323 17. Bijukchhe SM, Hill M, Adhikari B, Shrestha A, Shrestha S., 2023. Nepal’s worst dengue  
324 outbreak is a wake-up call for action. *J Travel Med* 30: taad112
- 325 18. Rimal S, Shrestha S, Pandey K, Nguyen TV, Bhandari P, Shah Y, Acharya D, Adhikari N,  
326 Rijal KR, Ghimire P, Takamatsu Y, Pandey BD, Fernandez S, Morita K, Ngwe Tun MM, et  
327 al., 2023. Co-Circulation of Dengue Virus Serotypes 1, 2, and 3 during the 2022 Dengue  
328 Outbreak in Nepal: A Cross-Sectional Study. *Viruses* 15: 507
- 329 19. Rimal S, Shrestha S, Paudel SW, Shah Y, Bhandari G, Pandey K, Kharbuja A, Kapandji M,  
330 Gautam I, Bhujel R, Takamatsu Y, Bhandari R, Klungthong C, Shrestha SK, Fernandez S, et  
331 al., 2024. Molecular and Entomological Characterization of 2023 Dengue Outbreak in  
332 Dhading District, Central Nepal. *Viruses* 16: 594
- 333 20. Dhoubhadel BG, Hayashi Y, Domai FM, Bhattarai S, Ariyoshi K, Pandey BD., 2023. A  
334 major dengue epidemic in 2022 in Nepal: need of an efficient early-warning system. *Front*  
335 *Trop Dis* 4: 1217939
- 336 21. Auchincloss AH, Gebreab SY, Mair C, Diez Roux AV., 2012. A Review of Spatial Methods  
337 in Epidemiology, 2000–2010. *Annu Rev Public Health* 33: 107–122
- 338 22. Graham AJ, Atkinson PM, Danson FM., 2004. Spatial analysis for epidemiology. *Acta Trop*  
339 91: 219–225

- 340 23. Oliveira MA de, Ribeiro H, Castillo-Salgado C., 2013. Geospatial analysis applied to  
341 epidemiological studies of dengue: a systematic review. *Rev Bras Epidemiol Braz J*  
342 *Epidemiol 16*: 907–917
- 343 24. Lippi CA, Stewart-Ibarra AM, Romero M, Lowe R, Mahon R, Van Meerbeeck CJ, Rollock  
344 L, Gittens-St Hilaire M, Trotman AR, Holligan D, Kirton S, Borbor-Cordova MJ, Ryan SJ.,  
345 2020. Spatiotemporal Tools for Emerging and Endemic Disease Hotspots in Small Areas:  
346 An Analysis of Dengue and Chikungunya in Barbados, 2013-2016. *Am J Trop Med Hyg*  
347 *103*: 149–156
- 348 25. National Statistics Office., 2023. *National Population and Housing Census 2021*.  
349 Thapathali, Kathmandu: National Statistics Office, Office of the Prime Minister and  
350 Council of Ministers
- 351 26. Duncan JMA, Biggs EM., 2012. Assessing the accuracy and applied use of satellite-derived  
352 precipitation estimates over Nepal. *Appl Geogr 34*: 626–638
- 353 27. Talchabhadel R, Karki R, Thapa BR, Maharjan M, Parajuli B., 2018. Spatio-temporal  
354 variability of extreme precipitation in Nepal. *Int J Climatol 38*: 4296–4313
- 355 28. ECDC., 2023. *2023\_12\_15 Dengue Situation Update*. Kathmandu, Nepal: Epidemiology  
356 and Disease Control Division, Department of Health Services, Ministry of Health and  
357 Population
- 358 29. ECDC., 2022. *Situation Update of Dengue 2022 (As of 31th Dec, 2022)*. Kathmandu,  
359 Nepal: Epidemiology and Disease Control Division, Department of Health Services,  
360 Ministry of Health and Population
- 361 30. Central Bureau of Statistics., 2012. *National Population and Housing Census 2011*.  
362 Kathmandu, Nepal: National Central Bureau of Statistics, Planning Commission Secretariat

- 363 31. ESRI., 2023. ArcGIS Pro
- 364 32. Center For International Earth Science Information Network-CIESIN-Columbia  
365 University., 2016. Documentation for Gridded Population of the World, Version 4  
366 (GPWv4). Palisades, NY: NASA Socioeconomic Data and Applications Center (SEDAC)
- 367 33. Lloyd CT, Chamberlain H, Kerr D, Yetman G, Pistolesi L, Stevens FR, Gaughan AE,  
368 Nieves JJ, Hornby G, MacManus K, Sinha P, Bondarenko M, Sorichetta A, Tatem AJ.,  
369 2019. Global spatio-temporally harmonised datasets for producing high-resolution gridded  
370 population distribution datasets. *Big Earth Data* 3: 108–139
- 371 34. Luc Anselin, Ibnu Syabri, Youngihn Kho., 2006. GeoDa: An Introduction to Spatial Data  
372 Analysis. *Geographical Analysis* 38 (1), 5-22
- 373 35. Ikejezie J, Langley T, Lewis S, Bisanzio D, Phalkey R., 2022. The epidemiology of  
374 diphtheria in Haiti, December 2014–June 2021: A spatial modeling analysis. *PLOS ONE*  
375 17: e0273398
- 376 36. Parra-Amaya M, Puerta-Yepes M, Lizarralde-Bejarano D, Arboleda-Sánchez S., 2016.  
377 Early Detection for Dengue Using Local Indicator of Spatial Association (LISA) Analysis.  
378 *Diseases* 4: 16
- 379 37. Anselin L., 1995. Local Indicators of Spatial Association—LISA. *Geogr Anal* 27: 93–115
- 380 38. Anselin L, Lozano N, Koschinsky J., 2006. Rate transformations and smoothing. *Urbana*  
381 51: 61801
- 382
